# Supplementary material
Source: publisher figshare collection journal article supplement (https://acs.figshare.com/ndownloader/files/5677836)
Supplement: Supplementary file 1 [file 5677836]

  
data_tere2 
 
_audit_creation_method            SHELXL-97 
_chemical_name_systematic 
; 
 ? 
; 
_chemical_name_common             ? 
_chemical_melting_point           ? 
_chemical_formula_moiety          ? 
_chemical_formula_sum 
 'C32 H26 Fe N2 O4' 
_chemical_formula_weight          558.40 
 
loop_ 
 _atom_type_symbol 
 _atom_type_description 
 _atom_type_scat_dispersion_real 
 _atom_type_scat_dispersion_imag 
 _atom_type_scat_source 
 'C'  'C'   0.0033   0.0016 
 'International Tables Vol C Tables 4.2.6.8 and 6.1.1.4' 
 'H'  'H'   0.0000   0.0000 
 'International Tables Vol C Tables 4.2.6.8 and 6.1.1.4' 
 'Fe'  'Fe'   0.3463   0.8444 
 'International Tables Vol C Tables 4.2.6.8 and 6.1.1.4' 
 'N'  'N'   0.0061   0.0033 
 'International Tables Vol C Tables 4.2.6.8 and 6.1.1.4' 
 'O'  'O'   0.0106   0.0060 
 'International Tables Vol C Tables 4.2.6.8 and 6.1.1.4' 
 
_symmetry_cell_setting            ? 
_symmetry_space_group_name_H-M    ? 
 
loop_ 
 _symmetry_equiv_pos_as_xyz 
 'x, y, z' 
 '-x, -y, -z' 
 
_cell_length_a                    10.5120(11) 
_cell_length_b                    10.6129(13) 
_cell_length_c                    11.9898(17) 
_cell_angle_alpha                 99.491(11) 
_cell_angle_beta                  104.692(10) 
_cell_angle_gamma                 92.190(9) 
_cell_volume                      1271.7(3) 
_cell_formula_units_Z             2 
_cell_measurement_temperature     293(2) 
_cell_measurement_reflns_used     ? 
_cell_measurement_theta_min       ? 
_cell_measurement_theta_max       ? 
 
_exptl_crystal_description        ? 
_exptl_crystal_colour             ? 
_exptl_crystal_size_max           ? 
_exptl_crystal_size_mid           ? 
_exptl_crystal_size_min           ? 
_exptl_crystal_density_meas       ? 
_exptl_crystal_density_diffrn     1.458 
_exptl_crystal_density_method     'not measured' 
_exptl_crystal_F_000              580 
_exptl_absorpt_coefficient_mu     0.636 
_exptl_absorpt_correction_type    ? 
_exptl_absorpt_correction_T_min   ? 
_exptl_absorpt_correction_T_max   ? 
_exptl_absorpt_process_details    ? 
 
_exptl_special_details 
; 
 ? 
; 
 
_diffrn_ambient_temperature       293(2) 
_diffrn_radiation_wavelength      0.71073 
_diffrn_radiation_type            MoK\a 
_diffrn_radiation_source          'fine-focus sealed tube' 
_diffrn_radiation_monochromator   graphite 
_diffrn_measurement_device_type   ? 
_diffrn_measurement_method        ? 
_diffrn_detector_area_resol_mean  ? 
_diffrn_standards_number          ? 
_diffrn_standards_interval_count  ? 
_diffrn_standards_interval_time   ? 
_diffrn_standards_decay_%         ? 
_diffrn_reflns_number             4742 
_diffrn_reflns_av_R_equivalents   0.0747 
_diffrn_reflns_av_sigmaI/netI     0.0589 
_diffrn_reflns_limit_h_min        0 
_diffrn_reflns_limit_h_max        12 
_diffrn_reflns_limit_k_min        -12 
_diffrn_reflns_limit_k_max        12 
_diffrn_reflns_limit_l_min        -14 
_diffrn_reflns_limit_l_max        13 
_diffrn_reflns_theta_min          1.79 
_diffrn_reflns_theta_max          24.97 
_reflns_number_total              4475 
_reflns_number_gt                 3262 
_reflns_threshold_expression      >2sigma(I) 
 
_computing_data_collection        ? 
_computing_cell_refinement        ? 
_computing_data_reduction         ? 
_computing_structure_solution     'SHELXS-97 (Sheldrick, 1990)' 
_computing_structure_refinement   'SHELXL-97 (Sheldrick, 1997)' 
_computing_molecular_graphics     ? 
_computing_publication_material   ? 
 
_refine_special_details 
; 
 Refinement of F^2^ against ALL reflections.  The weighted R-factor wR and 
 goodness of fit S are based on F^2^, conventional R-factors R are based 
 on F, with F set to zero for negative F^2^. The threshold expression of 
 F^2^ > 2sigma(F^2^) is used only for calculating R-factors(gt) etc. and is 
 not relevant to the choice of reflections for refinement.  R-factors based 
 on F^2^ are statistically about twice as large as those based on F, and R- 
 factors based on ALL data will be even larger. 
; 
 
_refine_ls_structure_factor_coef  Fsqd  
_refine_ls_matrix_type            full 
_refine_ls_weighting_scheme       calc  
_refine_ls_weighting_details 
 'calc w=1/[\s^2^(Fo^2^)+(0.0802P)^2^+0.0000P] where P=(Fo^2^+2Fc^2^)/3' 
_atom_sites_solution_primary      direct 
_atom_sites_solution_secondary    difmap 
_atom_sites_solution_hydrogens    geom 
_refine_ls_hydrogen_treatment     mixed 
_refine_ls_extinction_method      none 
_refine_ls_extinction_coef        ? 
_refine_ls_number_reflns          4475 
_refine_ls_number_parameters      450 
_refine_ls_number_restraints      0 
_refine_ls_R_factor_all           0.0939 
_refine_ls_R_factor_gt            0.0528 
_refine_ls_wR_factor_ref          0.1365 
_refine_ls_wR_factor_gt           0.1197 
_refine_ls_goodness_of_fit_ref    1.051 
_refine_ls_restrained_S_all       1.051 
_refine_ls_shift/su_max           0.187 
_refine_ls_shift/su_mean          0.004 
 
loop_ 
 _atom_site_label 
 _atom_site_type_symbol 
 _atom_site_fract_x 
 _atom_site_fract_y 
 _atom_site_fract_z 
 _atom_site_U_iso_or_equiv 
 _atom_site_adp_type 
 _atom_site_occupancy 
 _atom_site_symmetry_multiplicity 
 _atom_site_calc_flag 
 _atom_site_refinement_flags 
 _atom_site_disorder_assembly 
 _atom_site_disorder_group 
Fe1 Fe 0.25654(5) 0.39888(5) 0.57367(5) 0.03356(18) Uani 1 1 d . . . 
C1 C 0.3214(3) 0.2172(3) 0.5535(3) 0.0359(8) Uani 1 1 d . . . 
C2 C 0.2946(4) 0.2640(4) 0.4467(4) 0.0408(9) Uani 1 1 d . . . 
C3 C 0.1608(4) 0.2901(4) 0.4149(4) 0.0482(11) Uani 1 1 d . . . 
C4 C 0.1039(4) 0.2608(4) 0.5012(4) 0.0510(11) Uani 1 1 d . . . 
C5 C 0.2016(4) 0.2180(4) 0.5895(4) 0.0453(10) Uani 1 1 d . . . 
C6 C 0.3954(4) 0.5156(3) 0.7057(3) 0.0430(9) Uani 1 1 d . . . 
C7 C 0.3757(4) 0.5630(4) 0.5998(4) 0.0455(10) Uani 1 1 d . . . 
C8 C 0.2412(4) 0.5888(4) 0.5641(4) 0.0485(10) Uani 1 1 d . . . 
C9 C 0.1796(4) 0.5559(4) 0.6463(4) 0.0499(11) Uani 1 1 d . . . 
C10 C 0.2726(4) 0.5098(4) 0.7328(4) 0.0497(10) Uani 1 1 d . . . 
C11 C 0.4448(4) 0.1760(3) 0.6173(4) 0.0373(8) Uani 1 1 d . . . 
C12 C 0.5500(4) 0.1588(3) 0.5787(3) 0.0376(8) Uani 1 1 d . . . 
C13 C 0.6748(3) 0.1140(3) 0.6387(3) 0.0331(8) Uani 1 1 d . . . 
C14 C 0.6999(4) 0.0862(4) 0.7512(4) 0.0409(9) Uani 1 1 d . . . 
C15 C 0.8182(4) 0.0416(4) 0.8011(4) 0.0447(10) Uani 1 1 d . . . 
C16 C 0.8915(4) 0.0495(4) 0.6399(4) 0.0400(9) Uani 1 1 d . . . 
C17 C 0.7749(4) 0.0949(4) 0.5830(4) 0.0380(9) Uani 1 1 d . . . 
N1 N 0.9142(3) 0.0238(3) 0.7471(3) 0.0407(7) Uani 1 1 d . . . 
C18 C 0.5155(4) 0.4738(4) 0.7780(4) 0.0531(11) Uani 1 1 d . . . 
C19 C 0.6327(4) 0.4791(4) 0.7600(4) 0.0535(11) Uani 1 1 d . . . 
C20 C 0.7513(4) 0.4321(4) 0.8305(4) 0.0461(10) Uani 1 1 d . . . 
C21 C 0.8576(4) 0.4155(4) 0.7834(4) 0.0542(11) Uani 1 1 d . . . 
C22 C 0.9673(4) 0.3645(4) 0.8452(4) 0.0532(11) Uani 1 1 d . . . 
C23 C 0.8768(4) 0.3528(4) 0.9968(4) 0.0499(10) Uani 1 1 d . . . 
C24 C 0.7636(4) 0.4017(4) 0.9394(4) 0.0508(11) Uani 1 1 d . . . 
N2 N 0.9782(3) 0.3335(3) 0.9500(3) 0.0481(8) Uani 1 1 d . . . 
C01 C 1.5860(3) -0.2011(3) 0.9435(3) 0.0350(8) Uani 1 1 d . . . 
C02 C 1.4900(4) -0.1877(4) 1.0027(4) 0.0456(10) Uani 1 1 d . . . 
C03 C 1.3687(4) -0.1470(4) 0.9508(4) 0.0428(9) Uani 1 1 d . . . 
C04 C 1.3432(3) -0.1213(3) 0.8384(3) 0.0329(8) Uani 1 1 d . . . 
C05 C 1.4393(4) -0.1352(4) 0.7795(3) 0.0390(9) Uani 1 1 d . . . 
C06 C 1.5607(4) -0.1742(4) 0.8315(3) 0.0371(8) Uani 1 1 d . . . 
C07 C 1.7144(4) -0.2482(4) 1.0012(4) 0.0433(9) Uani 1 1 d . . . 
C08 C 1.2120(4) -0.0783(4) 0.7808(4) 0.0408(9) Uani 1 1 d . . . 
O01 O 1.7310(3) -0.2858(4) 1.0927(3) 0.0754(11) Uani 1 1 d . . . 
O02 O 1.8040(3) -0.2420(3) 0.9444(3) 0.0521(7) Uani 1 1 d . . . 
H02 H 1.8736 -0.2633 0.9826 0.078 Uiso 1 1 calc R . . 
O03 O 1.1869(3) -0.0572(3) 0.6821(3) 0.0617(9) Uani 1 1 d . . . 
O04 O 1.1307(3) -0.0683(3) 0.8464(3) 0.0634(9) Uani 1 1 d . . . 
H04 H 1.0613 -0.0441 0.8109 0.095 Uiso 1 1 calc R . . 
H2 H 0.346(3) 0.277(3) 0.409(3) 0.019(9) Uiso 1 1 d . . . 
H3 H 0.124(5) 0.312(4) 0.350(4) 0.065(14) Uiso 1 1 d . . . 
H4 H 0.020(5) 0.263(4) 0.507(4) 0.068(14) Uiso 1 1 d . . . 
H5 H 0.180(5) 0.196(5) 0.656(5) 0.084(17) Uiso 1 1 d . . . 
H7 H 0.432(4) 0.578(4) 0.562(3) 0.042(11) Uiso 1 1 d . . . 
H8 H 0.209(5) 0.619(4) 0.497(4) 0.066(14) Uiso 1 1 d . . . 
H9 H 0.104(5) 0.563(4) 0.650(4) 0.063(15) Uiso 1 1 d . . . 
H10 H 0.255(4) 0.479(4) 0.794(4) 0.058(13) Uiso 1 1 d . . . 
H11 H 0.442(4) 0.162(4) 0.690(4) 0.052(12) Uiso 1 1 d . . . 
H12 H 0.552(3) 0.168(3) 0.499(3) 0.026(8) Uiso 1 1 d . . . 
H14 H 0.640(4) 0.090(4) 0.796(3) 0.046(11) Uiso 1 1 d . . . 
H15 H 0.832(4) 0.022(4) 0.880(4) 0.056(12) Uiso 1 1 d . . . 
H16 H 0.960(4) 0.039(3) 0.604(3) 0.042(10) Uiso 1 1 d . . . 
H17 H 0.765(4) 0.109(3) 0.509(3) 0.036(10) Uiso 1 1 d . . . 
H18 H 0.545(7) 0.448(6) 0.846(6) 0.12(2) Uiso 1 1 d . . . 
H19 H 0.643(6) 0.515(6) 0.682(5) 0.11(2) Uiso 1 1 d . . . 
H21 H 0.863(5) 0.432(5) 0.706(5) 0.092(18) Uiso 1 1 d . . . 
H22 H 1.035(5) 0.351(4) 0.818(4) 0.061(14) Uiso 1 1 d . . . 
H23 H 0.889(5) 0.325(5) 1.075(5) 0.082(16) Uiso 1 1 d . . . 
H24 H 0.708(4) 0.417(4) 0.978(4) 0.052(13) Uiso 1 1 d . . . 
H02 H 1.511(4) -0.205(4) 1.078(4) 0.055(12) Uiso 1 1 d . . . 
H03 H 1.301(4) -0.136(3) 0.993(3) 0.039(10) Uiso 1 1 d . . . 
H05 H 1.421(4) -0.120(3) 0.704(3) 0.042(10) Uiso 1 1 d . . . 
H06 H 1.626(3) -0.188(3) 0.796(3) 0.025(9) Uiso 1 1 d . . . 
 
loop_ 
 _atom_site_aniso_label 
 _atom_site_aniso_U_11 
 _atom_site_aniso_U_22 
 _atom_site_aniso_U_33 
 _atom_site_aniso_U_23 
 _atom_site_aniso_U_13 
 _atom_site_aniso_U_12 
Fe1 0.0228(3) 0.0345(3) 0.0423(3) 0.0120(2) 0.0020(2) 0.01063(19) 
C1 0.0258(18) 0.0308(18) 0.048(2) 0.0073(16) 0.0030(16) 0.0065(14) 
C2 0.034(2) 0.043(2) 0.044(2) 0.0070(18) 0.0073(19) 0.0096(17) 
C3 0.037(2) 0.047(2) 0.047(3) 0.004(2) -0.010(2) 0.0117(18) 
C4 0.023(2) 0.042(2) 0.081(3) 0.013(2) -0.001(2) 0.0041(17) 
C5 0.031(2) 0.040(2) 0.068(3) 0.021(2) 0.012(2) 0.0080(16) 
C6 0.037(2) 0.034(2) 0.049(2) 0.0042(17) -0.0038(18) 0.0113(16) 
C7 0.036(2) 0.037(2) 0.064(3) 0.0101(19) 0.015(2) 0.0042(17) 
C8 0.049(2) 0.037(2) 0.055(3) 0.0138(19) 0.001(2) 0.0164(18) 
C9 0.038(2) 0.054(3) 0.058(3) 0.009(2) 0.011(2) 0.025(2) 
C10 0.053(3) 0.058(3) 0.041(2) 0.011(2) 0.013(2) 0.016(2) 
C11 0.034(2) 0.036(2) 0.042(2) 0.0115(17) 0.0058(17) 0.0128(15) 
C12 0.033(2) 0.042(2) 0.037(2) 0.0096(16) 0.0046(17) 0.0122(16) 
C13 0.0288(18) 0.0300(18) 0.040(2) 0.0073(15) 0.0058(15) 0.0070(14) 
C14 0.030(2) 0.049(2) 0.051(2) 0.0178(19) 0.0154(18) 0.0168(17) 
C15 0.034(2) 0.059(3) 0.045(2) 0.019(2) 0.0091(18) 0.0156(18) 
C16 0.0257(19) 0.046(2) 0.052(2) 0.0088(18) 0.0157(18) 0.0120(16) 
C17 0.035(2) 0.042(2) 0.038(2) 0.0092(17) 0.0092(17) 0.0103(16) 
N1 0.0283(16) 0.0453(18) 0.050(2) 0.0125(15) 0.0090(14) 0.0144(14) 
C18 0.041(2) 0.046(2) 0.058(3) 0.000(2) -0.010(2) 0.0134(19) 
C19 0.038(2) 0.048(2) 0.064(3) 0.011(2) -0.006(2) 0.0085(18) 
C20 0.037(2) 0.040(2) 0.049(2) 0.0048(18) -0.0076(18) 0.0035(17) 
C21 0.044(2) 0.062(3) 0.053(3) 0.017(2) 0.001(2) 0.007(2) 
C22 0.034(2) 0.062(3) 0.059(3) 0.007(2) 0.007(2) 0.007(2) 
C23 0.039(2) 0.055(3) 0.052(3) 0.012(2) 0.002(2) 0.0091(19) 
C24 0.032(2) 0.054(3) 0.061(3) 0.002(2) 0.009(2) 0.0088(19) 
N2 0.0300(17) 0.051(2) 0.057(2) 0.0126(17) -0.0020(16) 0.0084(15) 
C01 0.0289(18) 0.039(2) 0.038(2) 0.0102(16) 0.0079(16) 0.0102(15) 
C02 0.040(2) 0.066(3) 0.038(2) 0.025(2) 0.0120(18) 0.0193(19) 
C03 0.033(2) 0.060(3) 0.045(2) 0.0214(19) 0.0178(18) 0.0182(18) 
C04 0.0275(18) 0.0342(18) 0.038(2) 0.0114(15) 0.0058(15) 0.0092(14) 
C05 0.038(2) 0.051(2) 0.031(2) 0.0144(17) 0.0078(17) 0.0126(17) 
C06 0.0283(19) 0.045(2) 0.042(2) 0.0094(17) 0.0146(17) 0.0112(16) 
C07 0.035(2) 0.049(2) 0.047(2) 0.0144(19) 0.0081(18) 0.0156(17) 
C08 0.033(2) 0.045(2) 0.047(2) 0.0145(18) 0.0102(18) 0.0139(16) 
O01 0.0523(19) 0.125(3) 0.067(2) 0.060(2) 0.0164(17) 0.0407(19) 
O02 0.0299(15) 0.073(2) 0.0597(18) 0.0273(15) 0.0099(14) 0.0210(14) 
O03 0.0476(17) 0.099(2) 0.0504(18) 0.0385(17) 0.0140(14) 0.0330(16) 
O04 0.0362(16) 0.110(3) 0.0598(19) 0.0418(18) 0.0191(15) 0.0388(17) 
 
_geom_special_details 
; 
 All esds (except the esd in the dihedral angle between two l.s. planes) 
 are estimated using the full covariance matrix.  The cell esds are taken 
 into account individually in the estimation of esds in distances, angles 
 and torsion angles; correlations between esds in cell parameters are only 
 used when they are defined by crystal symmetry.  An approximate (isotropic) 
 treatment of cell esds is used for estimating esds involving l.s. planes. 
; 
 
loop_ 
 _geom_bond_atom_site_label_1 
 _geom_bond_atom_site_label_2 
 _geom_bond_distance 
 _geom_bond_site_symmetry_2 
 _geom_bond_publ_flag 
Fe1 C10 2.034(4) . ? 
Fe1 C5 2.036(4) . ? 
Fe1 C7 2.038(4) . ? 
Fe1 C2 2.040(4) . ? 
Fe1 C4 2.042(4) . ? 
Fe1 C9 2.042(4) . ? 
Fe1 C3 2.046(4) . ? 
Fe1 C8 2.048(4) . ? 
Fe1 C6 2.053(4) . ? 
Fe1 C1 2.066(3) . ? 
C1 C2 1.416(5) . ? 
C1 C5 1.431(5) . ? 
C1 C11 1.452(5) . ? 
C2 C3 1.411(6) . ? 
C3 C4 1.391(7) . ? 
C4 C5 1.422(6) . ? 
C6 C10 1.410(6) . ? 
C6 C7 1.412(6) . ? 
C6 C18 1.469(5) . ? 
C7 C8 1.421(6) . ? 
C8 C9 1.390(7) . ? 
C9 C10 1.400(6) . ? 
C11 C12 1.311(5) . ? 
C12 C13 1.465(5) . ? 
C13 C17 1.387(5) . ? 
C13 C14 1.390(5) . ? 
C14 C15 1.375(5) . ? 
C15 N1 1.334(5) . ? 
C16 N1 1.323(5) . ? 
C16 C17 1.389(5) . ? 
C18 C19 1.304(7) . ? 
C19 C20 1.473(5) . ? 
C20 C24 1.373(6) . ? 
C20 C21 1.379(6) . ? 
C21 C22 1.385(6) . ? 
C22 N2 1.328(6) . ? 
C23 N2 1.333(5) . ? 
C23 C24 1.381(6) . ? 
C01 C02 1.372(5) . ? 
C01 C06 1.380(5) . ? 
C01 C07 1.498(5) . ? 
C02 C03 1.388(5) . ? 
C03 C04 1.382(5) . ? 
C04 C05 1.371(5) . ? 
C04 C08 1.502(5) . ? 
C05 C06 1.382(5) . ? 
C07 O01 1.203(5) . ? 
C07 O02 1.299(5) . ? 
C08 O03 1.205(5) . ? 
C08 O04 1.296(4) . ? 
 
loop_ 
 _geom_angle_atom_site_label_1 
 _geom_angle_atom_site_label_2 
 _geom_angle_atom_site_label_3 
 _geom_angle 
 _geom_angle_site_symmetry_1 
 _geom_angle_site_symmetry_3 
 _geom_angle_publ_flag 
C10 Fe1 C5 105.67(19) . . ? 
C10 Fe1 C7 67.84(19) . . ? 
C5 Fe1 C7 157.94(16) . . ? 
C10 Fe1 C2 160.64(16) . . ? 
C5 Fe1 C2 68.15(18) . . ? 
C7 Fe1 C2 110.60(18) . . ? 
C10 Fe1 C4 120.8(2) . . ? 
C5 Fe1 C4 40.83(16) . . ? 
C7 Fe1 C4 160.72(17) . . ? 
C2 Fe1 C4 67.30(18) . . ? 
C10 Fe1 C9 40.19(17) . . ? 
C5 Fe1 C9 121.94(19) . . ? 
C7 Fe1 C9 67.58(18) . . ? 
C2 Fe1 C9 158.69(16) . . ? 
C4 Fe1 C9 106.99(19) . . ? 
C10 Fe1 C3 156.26(18) . . ? 
C5 Fe1 C3 68.31(19) . . ? 
C7 Fe1 C3 126.05(19) . . ? 
C2 Fe1 C3 40.42(16) . . ? 
C4 Fe1 C3 39.78(19) . . ? 
C9 Fe1 C3 122.09(17) . . ? 
C10 Fe1 C8 67.52(19) . . ? 
C5 Fe1 C8 158.29(17) . . ? 
C7 Fe1 C8 40.70(16) . . ? 
C2 Fe1 C8 124.84(18) . . ? 
C4 Fe1 C8 123.41(17) . . ? 
C9 Fe1 C8 39.73(18) . . ? 
C3 Fe1 C8 109.13(18) . . ? 
C10 Fe1 C6 40.35(17) . . ? 
C5 Fe1 C6 121.16(17) . . ? 
C7 Fe1 C6 40.37(17) . . ? 
C2 Fe1 C6 125.83(16) . . ? 
C4 Fe1 C6 156.65(19) . . ? 
C9 Fe1 C6 67.59(16) . . ? 
C3 Fe1 C6 162.35(18) . . ? 
C8 Fe1 C6 67.91(16) . . ? 
C10 Fe1 C1 123.18(16) . . ? 
C5 Fe1 C1 40.83(15) . . ? 
C7 Fe1 C1 123.73(15) . . ? 
C2 Fe1 C1 40.32(15) . . ? 
C4 Fe1 C1 68.05(15) . . ? 
C9 Fe1 C1 158.80(17) . . ? 
C3 Fe1 C1 68.18(15) . . ? 
C8 Fe1 C1 160.07(16) . . ? 
C6 Fe1 C1 108.30(14) . . ? 
C2 C1 C5 106.7(3) . . ? 
C2 C1 C11 128.2(4) . . ? 
C5 C1 C11 125.1(4) . . ? 
C2 C1 Fe1 68.8(2) . . ? 
C5 C1 Fe1 68.4(2) . . ? 
C11 C1 Fe1 127.4(3) . . ? 
C3 C2 C1 109.2(4) . . ? 
C3 C2 Fe1 70.0(2) . . ? 
C1 C2 Fe1 70.8(2) . . ? 
C4 C3 C2 107.6(4) . . ? 
C4 C3 Fe1 70.0(3) . . ? 
C2 C3 Fe1 69.6(2) . . ? 
C3 C4 C5 109.1(4) . . ? 
C3 C4 Fe1 70.3(2) . . ? 
C5 C4 Fe1 69.3(2) . . ? 
C4 C5 C1 107.3(4) . . ? 
C4 C5 Fe1 69.8(2) . . ? 
C1 C5 Fe1 70.7(2) . . ? 
C10 C6 C7 107.3(3) . . ? 
C10 C6 C18 123.0(4) . . ? 
C7 C6 C18 129.7(4) . . ? 
C10 C6 Fe1 69.1(2) . . ? 
C7 C6 Fe1 69.3(2) . . ? 
C18 C6 Fe1 125.3(3) . . ? 
C6 C7 C8 107.9(4) . . ? 
C6 C7 Fe1 70.4(2) . . ? 
C8 C7 Fe1 70.0(2) . . ? 
C9 C8 C7 107.7(4) . . ? 
C9 C8 Fe1 69.9(2) . . ? 
C7 C8 Fe1 69.3(2) . . ? 
C8 C9 C10 108.8(4) . . ? 
C8 C9 Fe1 70.4(2) . . ? 
C10 C9 Fe1 69.6(2) . . ? 
C9 C10 C6 108.3(4) . . ? 
C9 C10 Fe1 70.2(3) . . ? 
C6 C10 Fe1 70.6(2) . . ? 
C12 C11 C1 125.8(4) . . ? 
C11 C12 C13 127.6(4) . . ? 
C17 C13 C14 116.2(3) . . ? 
C17 C13 C12 120.4(3) . . ? 
C14 C13 C12 123.4(3) . . ? 
C15 C14 C13 120.3(4) . . ? 
N1 C15 C14 123.2(4) . . ? 
N1 C16 C17 123.4(4) . . ? 
C13 C17 C16 119.8(4) . . ? 
C16 N1 C15 117.2(3) . . ? 
C19 C18 C6 126.4(5) . . ? 
C18 C19 C20 125.8(5) . . ? 
C24 C20 C21 117.2(4) . . ? 
C24 C20 C19 124.9(4) . . ? 
C21 C20 C19 117.9(4) . . ? 
C20 C21 C22 118.9(4) . . ? 
N2 C22 C21 123.8(5) . . ? 
N2 C23 C24 122.1(4) . . ? 
C20 C24 C23 120.7(4) . . ? 
C22 N2 C23 117.3(4) . . ? 
C02 C01 C06 119.4(3) . . ? 
C02 C01 C07 118.9(3) . . ? 
C06 C01 C07 121.7(3) . . ? 
C01 C02 C03 120.4(4) . . ? 
C04 C03 C02 120.1(4) . . ? 
C05 C04 C03 119.2(3) . . ? 
C05 C04 C08 120.1(3) . . ? 
C03 C04 C08 120.7(3) . . ? 
C04 C05 C06 120.8(3) . . ? 
C01 C06 C05 120.1(3) . . ? 
O01 C07 O02 124.5(3) . . ? 
O01 C07 C01 121.7(4) . . ? 
O02 C07 C01 113.8(3) . . ? 
O03 C08 O04 124.5(3) . . ? 
O03 C08 C04 121.8(3) . . ? 
O04 C08 C04 113.7(3) . . ? 
 
_diffrn_measured_fraction_theta_max    0.997 
_diffrn_reflns_theta_full              24.97 
_diffrn_measured_fraction_theta_full   0.997 
_refine_diff_density_max    0.569 
_refine_diff_density_min   -0.730 
_refine_diff_density_rms    0.076 

#===END

data_trim 
 
_audit_creation_method            SHELXL-97 
_chemical_name_systematic 
; 
 ? 
; 
_chemical_name_common             ? 
_chemical_melting_point           ? 
_chemical_formula_moiety          ? 
_chemical_formula_sum 
 'C56 H58 Fe1.50 N3 O10' 
_chemical_formula_weight          1016.83 
 
loop_ 
 _atom_type_symbol 
 _atom_type_description 
 _atom_type_scat_dispersion_real 
 _atom_type_scat_dispersion_imag 
 _atom_type_scat_source 
 'C'  'C'   0.0033   0.0016 
 'International Tables Vol C Tables 4.2.6.8 and 6.1.1.4' 
 'H'  'H'   0.0000   0.0000 
 'International Tables Vol C Tables 4.2.6.8 and 6.1.1.4' 
 'Fe'  'Fe'   0.3463   0.8444 
 'International Tables Vol C Tables 4.2.6.8 and 6.1.1.4' 
 'N'  'N'   0.0061   0.0033 
 'International Tables Vol C Tables 4.2.6.8 and 6.1.1.4' 
 'O'  'O'   0.0106   0.0060 
 'International Tables Vol C Tables 4.2.6.8 and 6.1.1.4' 
 
_symmetry_cell_setting            ? 
_symmetry_space_group_name_H-M    ? 
 
loop_ 
 _symmetry_equiv_pos_as_xyz 
 'x, y, z' 
 '-x+1/2, -y+1/2, z+1/2' 
 'x+1/2, -y+1/2, -z' 
 '-x, y, -z+1/2' 
 '-x, -y, -z' 
 'x-1/2, y-1/2, -z-1/2' 
 '-x-1/2, y-1/2, z' 
 'x, -y, z-1/2' 
 
_cell_length_a                    13.0232(5) 
_cell_length_b                    23.4426(7) 
_cell_length_c                    33.1664(12) 
_cell_angle_alpha                 90.00 
_cell_angle_beta                  90.00 
_cell_angle_gamma                 90.00 
_cell_volume                      10125.6(6) 
_cell_formula_units_Z             8 
_cell_measurement_temperature     150
_cell_measurement_reflns_used     ? 
_cell_measurement_theta_min       ? 
_cell_measurement_theta_max       ? 
 
_exptl_crystal_description        ? 
_exptl_crystal_colour             ? 
_exptl_crystal_size_max           ? 
_exptl_crystal_size_mid           ? 
_exptl_crystal_size_min           ? 
_exptl_crystal_density_meas       ? 
_exptl_crystal_density_diffrn     1.334 
_exptl_crystal_density_method     'not measured' 
_exptl_crystal_F_000              4272 
_exptl_absorpt_coefficient_mu     0.498 
_exptl_absorpt_correction_type    ? 
_exptl_absorpt_correction_T_min   ? 
_exptl_absorpt_correction_T_max   ? 
_exptl_absorpt_process_details    ? 
 
_exptl_special_details 
; 
 ? 
; 
 
_diffrn_ambient_temperature       293(2) 
_diffrn_radiation_wavelength      0.71073 
_diffrn_radiation_type            MoK\a 
_diffrn_radiation_source          'fine-focus sealed tube' 
_diffrn_radiation_monochromator   graphite 
_diffrn_measurement_device_type   ? 
_diffrn_measurement_method        ? 
_diffrn_detector_area_resol_mean  ? 
_diffrn_standards_number          ? 
_diffrn_standards_interval_count  ? 
_diffrn_standards_interval_time   ? 
_diffrn_standards_decay_%         ? 
_diffrn_reflns_number             28708 
_diffrn_reflns_av_R_equivalents   0.0957 
_diffrn_reflns_av_sigmaI/netI     0.1132 
_diffrn_reflns_limit_h_min        -15 
_diffrn_reflns_limit_h_max        15 
_diffrn_reflns_limit_k_min        -27 
_diffrn_reflns_limit_k_max        27 
_diffrn_reflns_limit_l_min        -28 
_diffrn_reflns_limit_l_max        39 
_diffrn_reflns_theta_min          1.23 
_diffrn_reflns_theta_max          25.15 
_reflns_number_total              8957 
_reflns_number_gt                 3867 
_reflns_threshold_expression      >2sigma(I) 
 
_computing_data_collection        ? 
_computing_cell_refinement        ? 
_computing_data_reduction         ? 
_computing_structure_solution     'SHELXS-97 (Sheldrick, 1990)' 
_computing_structure_refinement   'SHELXL-97 (Sheldrick, 1997)' 
_computing_molecular_graphics     ? 
_computing_publication_material   ? 
 
_refine_special_details 
; 
 Refinement of F^2^ against ALL reflections.  The weighted R-factor wR and 
 goodness of fit S are based on F^2^, conventional R-factors R are based 
 on F, with F set to zero for negative F^2^. The threshold expression of 
 F^2^ > 2sigma(F^2^) is used only for calculating R-factors(gt) etc. and is 
 not relevant to the choice of reflections for refinement.  R-factors based 
 on F^2^ are statistically about twice as large as those based on F, and R- 
 factors based on ALL data will be even larger. 
; 
 
_refine_ls_structure_factor_coef  Fsqd  
_refine_ls_matrix_type            full 
_refine_ls_weighting_scheme       calc  
_refine_ls_weighting_details 
 'calc w=1/[\s^2^(Fo^2^)+(0.1756P)^2^+0.0000P] where P=(Fo^2^+2Fc^2^)/3' 
_atom_sites_solution_primary      direct 
_atom_sites_solution_secondary    difmap 
_atom_sites_solution_hydrogens    geom 
_refine_ls_hydrogen_treatment     mixed 
_refine_ls_extinction_method      SHELXL 
_refine_ls_extinction_coef        0.0135(10) 
_refine_ls_extinction_expression 
 'Fc^*^=kFc[1+0.001xFc^2^\l^3^/sin(2\q)]^-1/4^' 
_refine_ls_number_reflns          8957 
_refine_ls_number_parameters      661 
_refine_ls_number_restraints      0 
_refine_ls_R_factor_all           0.1877 
_refine_ls_R_factor_gt            0.0962 
_refine_ls_wR_factor_ref          0.2875 
_refine_ls_wR_factor_gt           0.2220 
_refine_ls_goodness_of_fit_ref    0.955 
_refine_ls_restrained_S_all       0.955 
_refine_ls_shift/su_max           0.285 
_refine_ls_shift/su_mean          0.017 
 
loop_ 
 _atom_site_label 
 _atom_site_type_symbol 
 _atom_site_fract_x 
 _atom_site_fract_y 
 _atom_site_fract_z 
 _atom_site_U_iso_or_equiv 
 _atom_site_adp_type 
 _atom_site_occupancy 
 _atom_site_symmetry_multiplicity 
 _atom_site_calc_flag 
 _atom_site_refinement_flags 
 _atom_site_disorder_assembly 
 _atom_site_disorder_group 
Fe1 Fe 0.59234(7) 0.26206(4) -0.08761(2) 0.0630(4) Uani 1 1 d . . . 
Fe2 Fe 0.5000 0.1772 0.2500 0.0753(5) Uani 1 2 d S . . 
N1 N 0.7521(4) 0.4266(3) 0.11277(16) 0.0833(16) Uani 1 1 d . . . 
HN1 H 0.721(4) 0.467(2) 0.1540(17) 0.062(17) Uiso 1 1 d . . . 
N2 N 0.4758(5) 0.4352(3) 0.11506(18) 0.0869(17) Uani 1 1 d . . . 
HN2 H 0.454(6) 0.465(3) 0.144(2) 0.11(2) Uiso 1 1 d . . . 
N3 N 0.3999(6) -0.1488(3) 0.21039(16) 0.0772(18) Uani 1 1 d . . . 
HN3 H 0.390(5) -0.186(3) 0.2173(17) 0.07(2) Uiso 1 1 d . . . 
O1 O 0.2095(5) 0.0609(2) 0.35825(15) 0.123(2) Uani 1 1 d . . . 
O2 O 0.2078(4) -0.0176(2) 0.32147(14) 0.0863(15) Uani 1 1 d . . . 
O3 O 0.0668(4) -0.0131(2) 0.18361(13) 0.0890(15) Uani 1 1 d . . . 
O4 O 0.0899(5) 0.0657(2) 0.14889(14) 0.114(2) Uani 1 1 d . . . 
O5 O 0.1210(4) 0.24404(17) 0.21991(13) 0.0883(15) Uani 1 1 d . . . 
O6 O 0.1602(4) 0.24951(17) 0.28543(13) 0.0810(14) Uani 1 1 d . . . 
O7 O 0.6081(6) 0.2110(3) 0.0828(3) 0.162(3) Uani 1 1 d . . . 
O8 O 0.6235(7) 0.1010(3) 0.0529(2) 0.152(3) Uani 1 1 d . . . 
O9 O 0.0730(16) 0.4387(9) 0.0761(7) 0.462(18) Uani 1 1 d . . . 
O10 O 0.2340(13) 0.4772(17) 0.0631(10) 0.73(3) Uani 1 1 d . . . 
C1 C 0.7251(5) 0.2737(4) -0.05529(19) 0.080(2) Uani 1 1 d . . . 
C2 C 0.7091(5) 0.2159(3) -0.0628(2) 0.085(2) Uani 1 1 d . . . 
H2 H 0.7012 0.1876 -0.0434 0.102 Uiso 1 1 calc R . . 
C3 C 0.7069(5) 0.2077(3) -0.1049(2) 0.087(2) Uani 1 1 d . . . 
H3 H 0.6994 0.1728 -0.1178 0.104 Uiso 1 1 calc R . . 
C4 C 0.7179(5) 0.2608(4) -0.1243(2) 0.088(2) Uani 1 1 d . . . 
H4 H 0.7170 0.2669 -0.1520 0.105 Uiso 1 1 calc R . . 
C5 C 0.7306(6) 0.3033(3) -0.0941(2) 0.090(2) Uani 1 1 d . . . 
H5 H 0.7404 0.3421 -0.0982 0.107 Uiso 1 1 calc R . . 
C6 C 0.4675(5) 0.2967(3) -0.0589(2) 0.0742(19) Uani 1 1 d . . . 
C7 C 0.4586(5) 0.2366(3) -0.0614(2) 0.0752(19) Uani 1 1 d . . . 
H7 H 0.4527 0.2113 -0.0399 0.090 Uiso 1 1 calc R . . 
C8 C 0.4602(5) 0.2230(3) -0.1023(2) 0.084(2) Uani 1 1 d . . . 
H8 H 0.4555 0.1862 -0.1126 0.100 Uiso 1 1 calc R . . 
C9 C 0.4699(5) 0.2720(4) -0.1253(2) 0.084(2) Uani 1 1 d . . . 
H9 H 0.4719 0.2737 -0.1533 0.101 Uiso 1 1 calc R . . 
C10 C 0.4761(5) 0.3185(3) -0.0986(2) 0.083(2) Uani 1 1 d . . . 
H10 H 0.4843 0.3566 -0.1058 0.100 Uiso 1 1 calc R . . 
C11 C 0.7300(5) 0.2986(4) -0.0138(2) 0.086(2) Uani 1 1 d . . . 
H11 H 0.7134 0.2745 0.0075 0.103 Uiso 1 1 calc R . . 
C12 C 0.7548(5) 0.3498(4) -0.0048(2) 0.091(2) Uani 1 1 d . . . 
H12 H 0.7741 0.3737 -0.0258 0.110 Uiso 1 1 calc R . . 
C13 C 0.7554(5) 0.3744(3) 0.03687(19) 0.0793(19) Uani 1 1 d . . . 
C14 C 0.7291(5) 0.3454(3) 0.0714(2) 0.0728(18) Uani 1 1 d . . . 
H14 H 0.7106 0.3071 0.0696 0.087 Uiso 1 1 calc R . . 
C15 C 0.7296(5) 0.3713(3) 0.10807(19) 0.0717(17) Uani 1 1 d . . . 
C16 C 0.7819(7) 0.4552(3) 0.0795(2) 0.100(2) Uani 1 1 d . . . 
H16 H 0.8026 0.4930 0.0822 0.120 Uiso 1 1 calc R . . 
C17 C 0.7833(6) 0.4313(4) 0.0418(2) 0.105(3) Uani 1 1 d . . . 
H17 H 0.8028 0.4529 0.0196 0.127 Uiso 1 1 calc R . . 
C18 C 0.7024(6) 0.3404(3) 0.1462(2) 0.095(2) Uani 1 1 d . . . 
H18A H 0.7641 0.3297 0.1602 0.114 Uiso 1 1 calc R . . 
H18B H 0.6636 0.3068 0.1398 0.114 Uiso 1 1 calc R . . 
H18C H 0.6620 0.3649 0.1632 0.114 Uiso 1 1 calc R . . 
C19 C 0.4749(7) 0.3372(5) -0.0228(3) 0.132(5) Uani 1 1 d . . . 
H19 H 0.4923 0.3752 -0.0270 0.158 Uiso 1 1 calc R . . 
C20 C 0.4592(8) 0.3213(4) 0.0095(5) 0.149(5) Uani 1 1 d . . . 
H20 H 0.4413 0.2832 0.0130 0.179 Uiso 1 1 calc R . . 
C21 C 0.4668(7) 0.3633(5) 0.0507(4) 0.115(3) Uani 1 1 d . . . 
C22 C 0.4995(7) 0.4184(6) 0.0434(2) 0.123(4) Uani 1 1 d . . . 
H22 H 0.5181 0.4308 0.0178 0.148 Uiso 1 1 calc R . . 
C23 C 0.5030(7) 0.4572(4) 0.0795(3) 0.109(3) Uani 1 1 d . . . 
C24 C 0.4507(6) 0.3813(4) 0.1153(3) 0.087(2) Uani 1 1 d . . . 
C25 C 0.4478(7) 0.3465(5) 0.0853(3) 0.125(3) Uani 1 1 d . . . 
H25 H 0.4313 0.3085 0.0897 0.150 Uiso 1 1 calc R . . 
C26A C 0.5324(13) 0.5120(5) 0.0748(4) 0.083(4) Uani 0.50 1 d P . . 
H26A H 0.4731 0.5362 0.0751 0.100 Uiso 0.50 1 calc PR . . 
H26B H 0.5676 0.5161 0.0495 0.100 Uiso 0.50 1 calc PR . . 
H26C H 0.5776 0.5226 0.0964 0.100 Uiso 0.50 1 calc PR . . 
C26B C 0.4262(17) 0.3603(8) 0.1463(6) 0.128(7) Uani 0.50 1 d P . . 
H26D H 0.4506 0.3834 0.1682 0.154 Uiso 0.50 1 calc PR . . 
H26E H 0.4556 0.3228 0.1483 0.154 Uiso 0.50 1 calc PR . . 
H26F H 0.3528 0.3576 0.1476 0.154 Uiso 0.50 1 calc PR . . 
C27 C 0.4650(5) 0.1292(3) 0.20024(19) 0.0708(18) Uani 1 1 d . . . 
C28 C 0.4032(6) 0.1785(3) 0.2023(2) 0.095(2) Uani 1 1 d . . . 
H28 H 0.3319 0.1789 0.2041 0.114 Uiso 1 1 calc R . . 
C29 C 0.4677(8) 0.2273(3) 0.2013(3) 0.109(3) Uani 1 1 d . . . 
H29 H 0.4461 0.2651 0.2020 0.131 Uiso 1 1 calc R . . 
C30 C 0.5673(7) 0.2089(4) 0.1990(2) 0.102(3) Uani 1 1 d . . . 
H30 H 0.6250 0.2323 0.1980 0.123 Uiso 1 1 calc R . . 
C31 C 0.5680(6) 0.1480(3) 0.1985(2) 0.087(2) Uani 1 1 d . . . 
H31 H 0.6259 0.1248 0.1973 0.105 Uiso 1 1 calc R . . 
C32 C 0.4289(5) 0.0696(3) 0.20240(19) 0.0784(19) Uani 1 1 d . . . 
H32 H 0.3602 0.0640 0.2089 0.094 Uiso 1 1 calc R . . 
C33 C 0.4835(6) 0.0243(3) 0.1961(2) 0.083(2) Uani 1 1 d . . . 
H33 H 0.5511 0.0302 0.1881 0.099 Uiso 1 1 calc R . . 
C34 C 0.4509(6) -0.0351(3) 0.20036(18) 0.0756(19) Uani 1 1 d . . . 
C35 C 0.3522(5) -0.0521(3) 0.21262(19) 0.0785(19) Uani 1 1 d . . . 
H35 H 0.3018 -0.0249 0.2174 0.094 Uiso 1 1 calc R . . 
C36 C 0.3299(6) -0.1092(3) 0.21754(19) 0.0771(19) Uani 1 1 d . . . 
C37 C 0.4942(8) -0.1344(3) 0.1982(2) 0.086(2) Uani 1 1 d . . . 
H37 H 0.5426 -0.1628 0.1935 0.104 Uiso 1 1 calc R . . 
C38 C 0.5208(6) -0.0776(3) 0.19253(19) 0.083(2) Uani 1 1 d . . . 
H38 H 0.5862 -0.0683 0.1834 0.100 Uiso 1 1 calc R . . 
C39 C 0.2265(6) -0.1276(3) 0.2317(3) 0.122(3) Uani 1 1 d . . . 
H39A H 0.1820 -0.1328 0.2090 0.147 Uiso 1 1 calc R . . 
H39B H 0.1984 -0.0990 0.2492 0.147 Uiso 1 1 calc R . . 
H39C H 0.2326 -0.1629 0.2462 0.147 Uiso 1 1 calc R . . 
C40 C 0.1640(4) 0.0681(3) 0.28985(16) 0.0568(15) Uani 1 1 d . . . 
C41 C 0.1376(4) 0.0391(2) 0.25419(16) 0.0576(15) Uani 1 1 d . . . 
H41 H 0.1348 -0.0005 0.2539 0.069 Uiso 1 1 calc R . . 
C42 C 0.1157(4) 0.0697(3) 0.21936(16) 0.0544(14) Uani 1 1 d . . . 
C43 C 0.1182(4) 0.1281(3) 0.22005(16) 0.0538(14) Uani 1 1 d . . . 
H43 H 0.1046 0.1484 0.1965 0.065 Uiso 1 1 calc R . . 
C44 C 0.1405(4) 0.1575(2) 0.25505(16) 0.0553(14) Uani 1 1 d . . . 
C45 C 0.1634(4) 0.1273(3) 0.28978(16) 0.0560(15) Uani 1 1 d . . . 
H45 H 0.1786 0.1470 0.3134 0.067 Uiso 1 1 calc R . . 
C46 C 0.1961(5) 0.0372(3) 0.3266(2) 0.0710(18) Uani 1 1 d . . . 
C47 C 0.0892(5) 0.0406(3) 0.1805(2) 0.0723(18) Uani 1 1 d . . . 
C48 C 0.1417(5) 0.2218(3) 0.25537(19) 0.0625(16) Uani 1 1 d . . . 
C49 C 0.5380(10) 0.1357(6) 0.0451(4) 0.169(5) Uani 1 1 d . . . 
H49A H 0.4774 0.1121 0.0421 0.203 Uiso 1 1 calc R . . 
H49B H 0.5484 0.1563 0.0201 0.203 Uiso 1 1 calc R . . 
C50 C 0.5218(9) 0.1765(5) 0.0780(4) 0.154(4) Uani 1 1 d . . . 
H50A H 0.4625 0.2001 0.0721 0.184 Uiso 1 1 calc R . . 
H50B H 0.5085 0.1560 0.1029 0.184 Uiso 1 1 calc R . . 
C51 C 0.6928(7) 0.1744(5) 0.0926(3) 0.131(3) Uani 1 1 d . . . 
H51A H 0.6781 0.1535 0.1172 0.157 Uiso 1 1 calc R . . 
H51B H 0.7542 0.1970 0.0969 0.157 Uiso 1 1 calc R . . 
C52 C 0.7091(8) 0.1350(5) 0.0598(3) 0.131(3) Uani 1 1 d . . . 
H52A H 0.7251 0.1562 0.0355 0.157 Uiso 1 1 calc R . . 
H52B H 0.7674 0.1108 0.0661 0.157 Uiso 1 1 calc R . . 
C53 C 0.1487(12) 0.4340(5) 0.1026(4) 0.176(5) Uani 1 1 d . . . 
H53A H 0.1846 0.3989 0.0963 0.211 Uiso 1 1 calc R . . 
H53B H 0.1170 0.4285 0.1288 0.211 Uiso 1 1 calc R . . 
C54 C 0.228(3) 0.4787(14) 0.1077(8) 0.552(12) Uani 1 1 d . . . 
H54A H 0.2027 0.5143 0.1187 0.663 Uiso 1 1 calc R . . 
H54B H 0.2898 0.4660 0.1213 0.663 Uiso 1 1 calc R . . 
C55 C 0.1494(10) 0.5199(4) 0.0535(3) 0.137(4) Uani 1 1 d . . . 
H55A H 0.1317 0.5444 0.0760 0.164 Uiso 1 1 calc R . . 
H55B H 0.1630 0.5424 0.0295 0.164 Uiso 1 1 calc R . . 
C56 C 0.0784(15) 0.4752(10) 0.0471(7) 0.299(13) Uani 1 1 d . . . 
H56A H 0.0109 0.4916 0.0430 0.359 Uiso 1 1 calc R . . 
H56B H 0.0972 0.4552 0.0226 0.359 Uiso 1 1 calc R . . 
 
loop_ 
 _atom_site_aniso_label 
 _atom_site_aniso_U_11 
 _atom_site_aniso_U_22 
 _atom_site_aniso_U_33 
 _atom_site_aniso_U_23 
 _atom_site_aniso_U_13 
 _atom_site_aniso_U_12 
Fe1 0.0609(6) 0.0734(7) 0.0549(6) -0.0060(4) 0.0013(4) -0.0015(4) 
Fe2 0.0590(9) 0.0534(9) 0.1136(11) 0.000 0.0070(7) 0.000 
N1 0.091(4) 0.084(5) 0.075(4) -0.004(3) 0.008(3) -0.007(3) 
N2 0.114(5) 0.082(5) 0.065(4) -0.011(3) 0.010(3) 0.014(4) 
N3 0.115(6) 0.048(4) 0.068(3) 0.001(3) -0.004(3) -0.009(4) 
O1 0.209(7) 0.085(4) 0.077(3) 0.003(3) -0.049(4) -0.014(4) 
O2 0.117(4) 0.073(4) 0.068(3) 0.018(3) -0.009(3) 0.012(3) 
O3 0.132(4) 0.063(3) 0.072(3) -0.006(2) -0.010(3) -0.015(3) 
O4 0.210(7) 0.072(3) 0.060(3) 0.002(2) -0.023(3) -0.008(3) 
O5 0.148(5) 0.054(3) 0.062(3) 0.001(2) -0.009(3) 0.007(3) 
O6 0.122(4) 0.055(3) 0.066(3) -0.012(2) -0.007(3) -0.001(2) 
O7 0.119(6) 0.100(5) 0.266(9) 0.010(5) -0.026(6) -0.019(5) 
O8 0.115(6) 0.149(7) 0.194(7) -0.002(5) -0.039(5) 0.016(5) 
O9 0.46(3) 0.41(2) 0.51(3) 0.29(2) -0.26(3) -0.24(2) 
O10 0.143(16) 1.23(8) 0.81(6) 0.58(6) 0.04(2) 0.11(3) 
C1 0.052(4) 0.122(7) 0.065(4) -0.016(4) -0.001(3) -0.001(4) 
C2 0.083(5) 0.094(6) 0.079(5) -0.014(4) -0.009(4) 0.018(4) 
C3 0.083(5) 0.085(6) 0.091(5) -0.019(4) 0.004(4) 0.020(4) 
C4 0.075(5) 0.131(7) 0.057(4) -0.017(5) 0.010(3) -0.006(5) 
C5 0.075(5) 0.096(6) 0.098(5) -0.003(5) 0.011(4) -0.021(4) 
C6 0.061(4) 0.096(6) 0.066(4) -0.032(4) -0.004(3) 0.006(4) 
C7 0.061(4) 0.090(6) 0.074(4) -0.012(4) 0.010(3) -0.019(4) 
C8 0.068(5) 0.101(6) 0.081(5) -0.027(4) -0.002(4) -0.024(4) 
C9 0.066(5) 0.123(7) 0.064(4) -0.003(5) -0.004(3) 0.001(4) 
C10 0.070(5) 0.097(6) 0.083(5) 0.012(4) -0.005(4) 0.014(4) 
C11 0.057(5) 0.109(6) 0.092(5) -0.002(4) -0.008(4) -0.007(4) 
C12 0.071(5) 0.107(6) 0.097(5) 0.006(5) 0.007(4) -0.007(5) 
C13 0.073(5) 0.104(6) 0.061(4) -0.019(4) -0.006(3) 0.007(4) 
C14 0.067(5) 0.070(4) 0.082(5) -0.017(4) -0.006(3) 0.007(3) 
C15 0.063(4) 0.078(5) 0.074(4) 0.001(4) 0.001(3) 0.006(4) 
C16 0.121(7) 0.081(5) 0.099(6) -0.017(5) 0.010(5) -0.014(5) 
C17 0.119(7) 0.111(7) 0.086(5) -0.008(5) 0.016(4) -0.030(5) 
C18 0.112(6) 0.086(5) 0.088(5) 0.003(4) -0.009(4) 0.008(4) 
C19 0.059(6) 0.206(13) 0.131(8) 0.067(9) 0.019(5) 0.022(6) 
C20 0.083(7) 0.094(7) 0.269(16) 0.011(9) -0.008(9) -0.012(5) 
C21 0.084(7) 0.126(9) 0.135(9) -0.041(8) -0.005(6) 0.023(6) 
C22 0.096(7) 0.220(12) 0.055(5) 0.035(6) 0.025(4) 0.060(7) 
C23 0.111(7) 0.126(8) 0.089(7) 0.001(5) 0.005(5) 0.035(6) 
C24 0.096(6) 0.087(7) 0.077(6) -0.026(5) 0.003(4) 0.009(5) 
C25 0.100(7) 0.174(11) 0.101(7) -0.037(8) 0.007(6) -0.007(6) 
C26A 0.139(14) 0.035(8) 0.075(9) -0.012(6) 0.016(8) 0.003(8) 
C26B 0.17(2) 0.115(16) 0.094(13) -0.014(11) -0.019(13) -0.022(14) 
C27 0.049(4) 0.066(5) 0.097(5) 0.011(3) 0.001(3) -0.002(4) 
C28 0.083(6) 0.087(6) 0.114(6) 0.015(4) -0.007(4) 0.018(5) 
C29 0.105(7) 0.050(5) 0.171(8) 0.027(5) 0.005(6) 0.007(5) 
C30 0.092(7) 0.082(6) 0.133(7) 0.025(5) 0.013(5) -0.022(5) 
C31 0.079(6) 0.082(6) 0.101(5) 0.015(4) 0.015(4) 0.004(4) 
C32 0.074(5) 0.076(5) 0.086(5) 0.002(4) 0.003(3) 0.005(4) 
C33 0.084(5) 0.073(6) 0.091(5) -0.002(4) 0.013(4) 0.005(4) 
C34 0.097(6) 0.061(5) 0.068(4) -0.009(3) -0.007(4) 0.004(4) 
C35 0.066(5) 0.083(6) 0.087(5) -0.004(4) 0.000(4) 0.007(4) 
C36 0.083(6) 0.067(5) 0.081(4) 0.006(4) -0.006(4) -0.007(5) 
C37 0.123(8) 0.063(6) 0.074(4) -0.011(4) -0.003(4) 0.013(5) 
C38 0.094(6) 0.083(6) 0.072(4) -0.001(4) 0.011(4) -0.001(5) 
C39 0.090(7) 0.103(7) 0.173(8) 0.026(6) -0.001(6) -0.021(5) 
C40 0.050(4) 0.057(4) 0.064(4) 0.007(3) 0.002(3) -0.003(3) 
C41 0.055(4) 0.055(4) 0.062(4) -0.002(3) -0.002(3) -0.001(3) 
C42 0.046(3) 0.064(4) 0.054(3) -0.008(3) 0.003(2) 0.000(3) 
C43 0.051(4) 0.054(4) 0.057(3) -0.003(3) -0.004(3) 0.005(3) 
C44 0.049(4) 0.058(4) 0.058(3) -0.002(3) 0.006(3) 0.002(3) 
C45 0.050(4) 0.062(4) 0.056(3) -0.007(3) -0.003(3) -0.002(3) 
C46 0.076(5) 0.065(5) 0.072(5) 0.009(4) -0.009(3) -0.008(4) 
C47 0.077(5) 0.073(5) 0.067(4) -0.006(4) -0.001(3) 0.007(4) 
C48 0.057(4) 0.060(4) 0.071(4) -0.012(3) 0.011(3) 0.002(3) 
C49 0.120(11) 0.202(14) 0.186(12) 0.017(10) -0.051(9) -0.031(10) 
C50 0.084(8) 0.163(12) 0.214(14) 0.016(9) 0.006(8) 0.012(8) 
C51 0.078(7) 0.139(9) 0.175(10) 0.010(7) -0.017(6) -0.011(6) 
C52 0.085(8) 0.163(10) 0.143(8) 0.011(7) -0.002(6) -0.007(7) 
C53 0.215(14) 0.161(11) 0.151(9) 0.068(8) -0.015(10) 0.063(10) 
C54 0.71(4) 0.63(3) 0.31(3) -0.21(3) 0.17(3) -0.526 
C55 0.159(10) 0.113(8) 0.138(8) 0.067(6) 0.012(7) -0.005(7) 
C56 0.24(2) 0.33(3) 0.33(3) 0.18(2) -0.135(18) -0.074(18) 
 
_geom_special_details 
; 
 All esds (except the esd in the dihedral angle between two l.s. planes) 
 are estimated using the full covariance matrix.  The cell esds are taken 
 into account individually in the estimation of esds in distances, angles 
 and torsion angles; correlations between esds in cell parameters are only 
 used when they are defined by crystal symmetry.  An approximate (isotropic) 
 treatment of cell esds is used for estimating esds involving l.s. planes. 
; 
 
loop_ 
 _geom_bond_atom_site_label_1 
 _geom_bond_atom_site_label_2 
 _geom_bond_distance 
 _geom_bond_site_symmetry_2 
 _geom_bond_publ_flag 
Fe1 C8 2.009(7) . ? 
Fe1 C7 2.037(6) . ? 
Fe1 C4 2.038(6) . ? 
Fe1 C9 2.039(7) . ? 
Fe1 C2 2.040(7) . ? 
Fe1 C10 2.044(7) . ? 
Fe1 C3 2.044(7) . ? 
Fe1 C6 2.052(6) . ? 
Fe1 C1 2.053(6) . ? 
Fe1 C5 2.055(7) . ? 
Fe2 C28 2.022(8) 4_655 ? 
Fe2 C28 2.022(7) . ? 
Fe2 C29 2.041(8) 4_655 ? 
Fe2 C29 2.041(8) . ? 
Fe2 C31 2.041(7) 4_655 ? 
Fe2 C31 2.041(7) . ? 
Fe2 C30 2.045(7) 4_655 ? 
Fe2 C30 2.045(7) . ? 
Fe2 C27 2.049(7) 4_655 ? 
Fe2 C27 2.049(7) . ? 
N1 C15 1.337(8) . ? 
N1 C16 1.349(9) . ? 
N2 C24 1.303(9) . ? 
N2 C23 1.334(10) . ? 
N3 C36 1.322(9) . ? 
N3 C37 1.336(9) . ? 
O1 C46 1.201(7) . ? 
O2 C46 1.303(7) . ? 
O3 C47 1.295(8) . ? 
O4 C47 1.201(7) . ? 
O5 C48 1.314(7) . ? 
O6 C48 1.214(6) . ? 
O7 C50 1.393(12) . ? 
O7 C51 1.436(11) . ? 
O8 C52 1.389(11) . ? 
O8 C49 1.404(13) . ? 
O9 C56 1.289(19) . ? 
O9 C53 1.324(18) . ? 
O10 C54 1.48(4) . ? 
O10 C55 1.52(2) . ? 
C1 C2 1.394(10) . ? 
C1 C5 1.464(10) . ? 
C1 C11 1.496(9) . ? 
C2 C3 1.410(9) . ? 
C3 C4 1.407(10) . ? 
C4 C5 1.422(9) . ? 
C6 C7 1.415(9) . ? 
C6 C10 1.418(10) . ? 
C6 C19 1.532(13) . ? 
C7 C8 1.394(9) . ? 
C8 C9 1.385(10) . ? 
C9 C10 1.406(9) . ? 
C11 C12 1.279(9) . ? 
C12 C13 1.496(9) . ? 
C13 C14 1.375(9) . ? 
C13 C17 1.392(9) . ? 
C14 C15 1.360(9) . ? 
C15 C18 1.502(9) . ? 
C16 C17 1.370(9) . ? 
C19 C20 1.153(13) . ? 
C20 C21 1.686(16) . ? 
C21 C25 1.239(13) . ? 
C21 C22 1.382(12) . ? 
C22 C23 1.506(13) . ? 
C23 C26A 1.349(14) . ? 
C24 C26B 1.186(18) . ? 
C24 C25 1.286(11) . ? 
C27 C28 1.410(9) . ? 
C27 C31 1.413(9) . ? 
C27 C32 1.475(9) . ? 
C28 C29 1.420(10) . ? 
C29 C30 1.369(10) . ? 
C30 C31 1.429(10) . ? 
C32 C33 1.296(9) . ? 
C33 C34 1.461(9) . ? 
C34 C38 1.375(9) . ? 
C34 C35 1.406(10) . ? 
C35 C36 1.378(9) . ? 
C36 C39 1.491(10) . ? 
C37 C38 1.390(10) . ? 
C40 C45 1.389(8) . ? 
C40 C41 1.406(7) . ? 
C40 C46 1.478(8) . ? 
C41 C42 1.390(7) . ? 
C42 C43 1.369(8) . ? 
C42 C47 1.501(8) . ? 
C43 C44 1.381(7) . ? 
C44 C45 1.384(7) . ? 
C44 C48 1.508(8) . ? 
C49 C50 1.465(15) . ? 
C51 C52 1.440(12) . ? 
C53 C54 1.48(2) . ? 
C55 C56 1.415(18) . ? 
 
loop_ 
 _geom_angle_atom_site_label_1 
 _geom_angle_atom_site_label_2 
 _geom_angle_atom_site_label_3 
 _geom_angle 
 _geom_angle_site_symmetry_1 
 _geom_angle_site_symmetry_3 
 _geom_angle_publ_flag 
C8 Fe1 C7 40.3(3) . . ? 
C8 Fe1 C4 122.4(3) . . ? 
C7 Fe1 C4 159.5(3) . . ? 
C8 Fe1 C9 40.0(3) . . ? 
C7 Fe1 C9 68.0(3) . . ? 
C4 Fe1 C9 105.3(3) . . ? 
C8 Fe1 C2 119.6(3) . . ? 
C7 Fe1 C2 108.1(3) . . ? 
C4 Fe1 C2 68.6(3) . . ? 
C9 Fe1 C2 153.0(3) . . ? 
C8 Fe1 C10 67.5(3) . . ? 
C7 Fe1 C10 68.4(3) . . ? 
C4 Fe1 C10 119.8(3) . . ? 
C9 Fe1 C10 40.3(3) . . ? 
C2 Fe1 C10 165.5(3) . . ? 
C8 Fe1 C3 105.8(3) . . ? 
C7 Fe1 C3 124.2(3) . . ? 
C4 Fe1 C3 40.3(3) . . ? 
C9 Fe1 C3 118.0(3) . . ? 
C2 Fe1 C3 40.4(3) . . ? 
C10 Fe1 C3 153.4(3) . . ? 
C8 Fe1 C6 67.3(3) . . ? 
C7 Fe1 C6 40.5(3) . . ? 
C4 Fe1 C6 156.7(3) . . ? 
C9 Fe1 C6 67.6(3) . . ? 
C2 Fe1 C6 127.8(3) . . ? 
C10 Fe1 C6 40.5(3) . . ? 
C3 Fe1 C6 162.8(3) . . ? 
C8 Fe1 C1 155.3(3) . . ? 
C7 Fe1 C1 122.4(3) . . ? 
C4 Fe1 C1 68.8(3) . . ? 
C9 Fe1 C1 164.5(3) . . ? 
C2 Fe1 C1 39.8(3) . . ? 
C10 Fe1 C1 129.2(3) . . ? 
C3 Fe1 C1 67.3(3) . . ? 
C6 Fe1 C1 111.9(3) . . ? 
C8 Fe1 C5 160.0(3) . . ? 
C7 Fe1 C5 158.8(3) . . ? 
C4 Fe1 C5 40.7(3) . . ? 
C9 Fe1 C5 124.6(3) . . ? 
C2 Fe1 C5 68.8(3) . . ? 
C10 Fe1 C5 109.0(3) . . ? 
C3 Fe1 C5 67.9(3) . . ? 
C6 Fe1 C5 123.9(3) . . ? 
C1 Fe1 C5 41.8(3) . . ? 
C28 Fe2 C28 178.3(5) 4_655 . ? 
C28 Fe2 C29 40.9(3) 4_655 4_655 ? 
C28 Fe2 C29 137.6(4) . 4_655 ? 
C28 Fe2 C29 137.6(4) 4_655 . ? 
C28 Fe2 C29 40.9(3) . . ? 
C29 Fe2 C29 109.7(5) 4_655 . ? 
C28 Fe2 C31 67.8(3) 4_655 4_655 ? 
C28 Fe2 C31 112.8(3) . 4_655 ? 
C29 Fe2 C31 67.7(3) 4_655 4_655 ? 
C29 Fe2 C31 139.9(4) . 4_655 ? 
C28 Fe2 C31 112.8(3) 4_655 . ? 
C28 Fe2 C31 67.8(3) . . ? 
C29 Fe2 C31 139.9(4) 4_655 . ? 
C29 Fe2 C31 67.7(3) . . ? 
C31 Fe2 C31 140.8(4) 4_655 . ? 
C28 Fe2 C30 67.4(3) 4_655 4_655 ? 
C28 Fe2 C30 111.9(4) . 4_655 ? 
C29 Fe2 C30 39.1(3) 4_655 4_655 ? 
C29 Fe2 C30 110.9(3) . 4_655 ? 
C31 Fe2 C30 41.0(3) 4_655 4_655 ? 
C31 Fe2 C30 178.3(4) . 4_655 ? 
C28 Fe2 C30 111.9(4) 4_655 . ? 
C28 Fe2 C30 67.4(3) . . ? 
C29 Fe2 C30 110.9(4) 4_655 . ? 
C29 Fe2 C30 39.1(3) . . ? 
C31 Fe2 C30 178.3(4) 4_655 . ? 
C31 Fe2 C30 41.0(3) . . ? 
C30 Fe2 C30 137.3(5) 4_655 . ? 
C28 Fe2 C27 40.5(3) 4_655 4_655 ? 
C28 Fe2 C27 141.0(3) . 4_655 ? 
C29 Fe2 C27 68.5(3) 4_655 4_655 ? 
C29 Fe2 C27 178.0(3) . 4_655 ? 
C31 Fe2 C27 40.4(3) 4_655 4_655 ? 
C31 Fe2 C27 113.1(3) . 4_655 ? 
C30 Fe2 C27 68.2(3) 4_655 4_655 ? 
C30 Fe2 C27 140.4(3) . 4_655 ? 
C28 Fe2 C27 141.0(3) 4_655 . ? 
C28 Fe2 C27 40.5(3) . . ? 
C29 Fe2 C27 178.0(3) 4_655 . ? 
C29 Fe2 C27 68.5(3) . . ? 
C31 Fe2 C27 113.1(3) 4_655 . ? 
C31 Fe2 C27 40.4(3) . . ? 
C30 Fe2 C27 140.4(3) 4_655 . ? 
C30 Fe2 C27 68.2(3) . . ? 
C27 Fe2 C27 113.4(4) 4_655 . ? 
C15 N1 C16 116.7(6) . . ? 
C24 N2 C23 116.5(7) . . ? 
C36 N3 C37 120.8(7) . . ? 
C50 O7 C51 107.3(8) . . ? 
C52 O8 C49 109.6(9) . . ? 
C56 O9 C53 120.7(16) . . ? 
C54 O10 C55 99(3) . . ? 
C2 C1 C5 108.1(6) . . ? 
C2 C1 C11 123.3(7) . . ? 
C5 C1 C11 128.5(7) . . ? 
C2 C1 Fe1 69.6(4) . . ? 
C5 C1 Fe1 69.2(4) . . ? 
C11 C1 Fe1 124.6(5) . . ? 
C1 C2 C3 108.2(7) . . ? 
C1 C2 Fe1 70.6(4) . . ? 
C3 C2 Fe1 70.0(4) . . ? 
C4 C3 C2 109.3(7) . . ? 
C4 C3 Fe1 69.6(4) . . ? 
C2 C3 Fe1 69.6(4) . . ? 
C3 C4 C5 108.0(6) . . ? 
C3 C4 Fe1 70.1(4) . . ? 
C5 C4 Fe1 70.3(4) . . ? 
C4 C5 C1 106.4(7) . . ? 
C4 C5 Fe1 69.1(4) . . ? 
C1 C5 Fe1 69.1(4) . . ? 
C7 C6 C10 108.2(6) . . ? 
C7 C6 C19 131.9(7) . . ? 
C10 C6 C19 119.9(8) . . ? 
C7 C6 Fe1 69.2(4) . . ? 
C10 C6 Fe1 69.4(4) . . ? 
C19 C6 Fe1 123.9(5) . . ? 
C8 C7 C6 106.5(6) . . ? 
C8 C7 Fe1 68.8(4) . . ? 
C6 C7 Fe1 70.3(4) . . ? 
C9 C8 C7 110.3(7) . . ? 
C9 C8 Fe1 71.1(4) . . ? 
C7 C8 Fe1 70.9(4) . . ? 
C8 C9 C10 107.6(6) . . ? 
C8 C9 Fe1 68.9(4) . . ? 
C10 C9 Fe1 70.1(4) . . ? 
C9 C10 C6 107.4(6) . . ? 
C9 C10 Fe1 69.7(4) . . ? 
C6 C10 Fe1 70.0(4) . . ? 
C12 C11 C1 126.3(8) . . ? 
C11 C12 C13 125.4(7) . . ? 
C14 C13 C17 116.2(6) . . ? 
C14 C13 C12 125.3(7) . . ? 
C17 C13 C12 118.6(7) . . ? 
C15 C14 C13 121.5(6) . . ? 
N1 C15 C14 122.6(6) . . ? 
N1 C15 C18 114.9(6) . . ? 
C14 C15 C18 122.5(7) . . ? 
N1 C16 C17 123.2(7) . . ? 
C16 C17 C13 119.7(7) . . ? 
C20 C19 C6 120.9(13) . . ? 
C19 C20 C21 123.5(12) . . ? 
C25 C21 C22 121.3(10) . . ? 
C25 C21 C20 123.7(11) . . ? 
C22 C21 C20 115.0(12) . . ? 
C21 C22 C23 115.8(8) . . ? 
N2 C23 C26A 123.2(9) . . ? 
N2 C23 C22 117.4(9) . . ? 
C26A C23 C22 119.4(10) . . ? 
C26B C24 C25 113.5(13) . . ? 
C26B C24 N2 118.3(11) . . ? 
C25 C24 N2 128.2(10) . . ? 
C21 C25 C24 120.6(12) . . ? 
C28 C27 C31 106.8(6) . . ? 
C28 C27 C32 126.3(7) . . ? 
C31 C27 C32 126.8(6) . . ? 
C28 C27 Fe2 68.7(4) . . ? 
C31 C27 Fe2 69.5(4) . . ? 
C32 C27 Fe2 123.5(4) . . ? 
C27 C28 C29 108.8(7) . . ? 
C27 C28 Fe2 70.8(4) . . ? 
C29 C28 Fe2 70.3(5) . . ? 
C30 C29 C28 108.0(7) . . ? 
C30 C29 Fe2 70.6(5) . . ? 
C28 C29 Fe2 68.8(4) . . ? 
C29 C30 C31 108.7(7) . . ? 
C29 C30 Fe2 70.3(5) . . ? 
C31 C30 Fe2 69.4(4) . . ? 
C27 C31 C30 107.8(6) . . ? 
C27 C31 Fe2 70.1(4) . . ? 
C30 C31 Fe2 69.7(4) . . ? 
C33 C32 C27 126.4(7) . . ? 
C32 C33 C34 127.3(7) . . ? 
C38 C34 C35 117.0(7) . . ? 
C38 C34 C33 118.6(7) . . ? 
C35 C34 C33 124.4(7) . . ? 
C36 C35 C34 120.2(7) . . ? 
N3 C36 C35 121.0(7) . . ? 
N3 C36 C39 118.4(7) . . ? 
C35 C36 C39 120.6(8) . . ? 
N3 C37 C38 120.8(7) . . ? 
C34 C38 C37 120.3(7) . . ? 
C45 C40 C41 118.7(5) . . ? 
C45 C40 C46 119.5(5) . . ? 
C41 C40 C46 121.8(6) . . ? 
C42 C41 C40 120.0(5) . . ? 
C43 C42 C41 119.8(5) . . ? 
C43 C42 C47 118.4(5) . . ? 
C41 C42 C47 121.8(6) . . ? 
C42 C43 C44 121.2(5) . . ? 
C43 C44 C45 119.4(5) . . ? 
C43 C44 C48 120.4(5) . . ? 
C45 C44 C48 120.2(5) . . ? 
C44 C45 C40 120.9(5) . . ? 
O1 C46 O2 123.5(6) . . ? 
O1 C46 C40 122.4(7) . . ? 
O2 C46 C40 114.1(6) . . ? 
O4 C47 O3 123.2(6) . . ? 
O4 C47 C42 121.6(7) . . ? 
O3 C47 C42 115.1(6) . . ? 
O6 C48 O5 124.3(6) . . ? 
O6 C48 C44 122.8(6) . . ? 
O5 C48 C44 112.8(5) . . ? 
O8 C49 C50 110.8(9) . . ? 
O7 C50 C49 110.4(10) . . ? 
O7 C51 C52 109.0(9) . . ? 
O8 C52 C51 112.0(9) . . ? 
O9 C53 C54 122.3(18) . . ? 
O10 C54 C53 84.6(18) . . ? 
C56 C55 O10 91.0(16) . . ? 
O9 C56 C55 114.5(16) . . ? 
 
_diffrn_measured_fraction_theta_max    0.987 
_diffrn_reflns_theta_full              25.15 
_diffrn_measured_fraction_theta_full   0.987 
_refine_diff_density_max    1.139 
_refine_diff_density_min   -1.070 
_refine_diff_density_rms    0.242 

#===END
